# Supplementary material
Source: PubMed Central journal article supplement (PMC2902289)

**Supplemental Figure 1:** Conditional inactivation of *Pkd1*. **A**, The wild type genomic locus. **B**, After homologous recombination to form *Pkd1<sup>fllox(neo)</sup>* (targeting construct in red). **C**, Removal of the intronic *neo* cassette by FLP recombinase to form the *Pkd1<sup>fllox</sup>* allele. **D**, Deletion of exons 2-4 by Cre. H, *HindIII*; N, *NsiI*; Nh, *NheI*; blue arrowhead, *loxP*; yellow arrowhead, FRT; black boxes, numbered exons. **E**, Extensive cystic changes are revealed on the cut surface of a P14 *Pkd1<sup>fllox/-</sup>:Ksp-Cre* kidney. Scale bar, 2 mm.

**Supplemental Figure 2:** Ksp-Cre is active in type A, but not type B, intercalated cells. RA/EGFP Cre reporter mice were crossed with Ksp-Cre and kidney sections labeled with AE1 (red) to mark type A intercalated cells (top) and pendrin (red) to mark type B intercalated cells (bottom). EGFP activity co-localized with AE1, but not pendrin, indicating Ksp-Cre activity in type A, but not type B, intercalated cells.

**Supplemental Figure 3:** Phospho-ERK1/2 (pERK) expression in the kidneys of 3 month old wild type mice. Size bar, 50  $\mu$ m.

**Supplemental Figure 4:** Phospho-ERK1/2 expression in the kidneys of P14 *Pkd1<sup>fllox/-</sup>:Ksp-Cre* mice treated with vehicle only (**A**) or 32 mg/kg U0126 (**B**) on P4, P7, P10 and P13. Treatment with U0126 inhibited increased ERK1/2 activation cyst lining cells. Size bar, 50  $\mu$ m.

**Supplemental Table 1: Serum studies in mice with kidney selective inactivation of *Pkd1***

|                              |    | <b>P7</b><br>[n=10 (±SD)] | <b>P value</b>             | <b>P14</b><br>[n=10 (±SD)] | <b>P value</b>             |
|------------------------------|----|---------------------------|----------------------------|----------------------------|----------------------------|
| <b>Glucose (mg/dL)</b>       | cy | 131 (±78)                 | 0.16                       | <b>137 (±44)</b>           | <b>3.1x10<sup>-5</sup></b> |
|                              | nc | 173 (±45)                 |                            | <b>262 (±53)</b>           |                            |
| <b>Cholesterol (mg/dL)</b>   | cy | 124 (±27)                 | 0.61                       | <b>285 (±50)</b>           | <b>1.9x10<sup>-5</sup></b> |
|                              | nc | 119 (±9.5)                |                            | <b>166 (±38)</b>           |                            |
| <b>Triglycerides (mg/dL)</b> | cy | 125 (±46.5)               | 0.72                       | 126 (±99)                  | 0.081                      |
|                              | nc | 116 (±53)                 |                            | 64 (±37)                   |                            |
| <b>Total protein (g/dL)</b>  | cy | 3.65 (±0.68)              | 0.47                       | 4.8 (±0.7)                 | 0.77                       |
|                              | nc | 3.82 (±0.26)              |                            | 4.9 (±0.9)                 |                            |
| <b>Albumin (g/dL)</b>        | cy | 1.76 (±0.36)              | 1.0                        | 2.37 (±0.4)                | 0.14                       |
|                              | nc | 1.76 (±0.18)              |                            | 2.68 (±0.48)               |                            |
| <b>Globulin (g/dL)</b>       | cy | 1.89 (±0.33)              | 0.15                       | 2.46 (±0.35)               | 0.27                       |
|                              | nc | 2.06 (±0.14)              |                            | 2.25 (±0.42)               |                            |
| <b>BUN (mg/dL)</b>           | cy | <b>65.9 (±21.2)</b>       | <b>7.5x10<sup>-6</sup></b> | <b>168 (±90)</b>           | <b>5.6x10<sup>-5</sup></b> |
|                              | nc | <b>21.8 (±3.8)</b>        |                            | <b>17 (±6.4)</b>           |                            |
| <b>Calcium (mg/dL)</b>       | cy | 8.7 (±1.3)                | 0.13                       | 9.8 (±2.0)                 | 0.21                       |
|                              | nc | 9.6 (±1.2)                |                            | 10.8(±1.2)                 |                            |
| <b>Phosphorus (mg/dL)</b>    | cy | 11.5 (±1.1)               | 0.08                       | <b>15.5 (±2.9)</b>         | <b>4.6x10<sup>-4</sup></b> |
|                              | nc | 10.5 (±1.2)               |                            | <b>11.1 (±1.3)</b>         |                            |
| <b>AST (U/L)</b>             | cy | 129.5 (±51.4)             | 0.06                       | 101.8 (±40.1)              | 0.54                       |

|                                   |    |                    |      |                    |       |
|-----------------------------------|----|--------------------|------|--------------------|-------|
|                                   | nc | 92.4 ( $\pm$ 28.2) |      | 92.6 ( $\pm$ 21.6) |       |
| <b>ALT (U/L)</b>                  | cy | 18.5 ( $\pm$ 4.8)  | 0.79 | 25.0 ( $\pm$ 5.0)  | 0.97  |
|                                   | nc | 19.1 ( $\pm$ 5.3)  |      | 24.9 ( $\pm$ 4.9)  |       |
| <b>Total bilirubin (mg/dL)</b>    | cy | 0.45 ( $\pm$ 0.25) | 0.09 | 0.26 ( $\pm$ 0.09) | 0.49  |
|                                   | nc | 0.3 ( $\pm$ 0.07)  |      | 0.23 ( $\pm$ 0.07) |       |
| <b>Alkaline phosphatase (U/L)</b> | cy | 529 ( $\pm$ 113)   | 0.09 | 772 ( $\pm$ 288)   | 0.086 |
|                                   | nc | 457 ( $\pm$ 57)    |      | 595 ( $\pm$ 108)   |       |
| <b>Amylase (U/L)</b>              | cy | 246 ( $\pm$ 54)    | 0.08 | 666 ( $\pm$ 232)   | 0.18  |
|                                   | nc | 282 ( $\pm$ 29)    |      | 822 ( $\pm$ 278)   |       |

cy: polycystic mice with *Pkd1*<sup>fllox/-</sup>:*Ksp-Cre*

nc: non-cystic controls

**bold** indicates statistically significant differences between cystic and control mice

# Supplementary Fig. 1

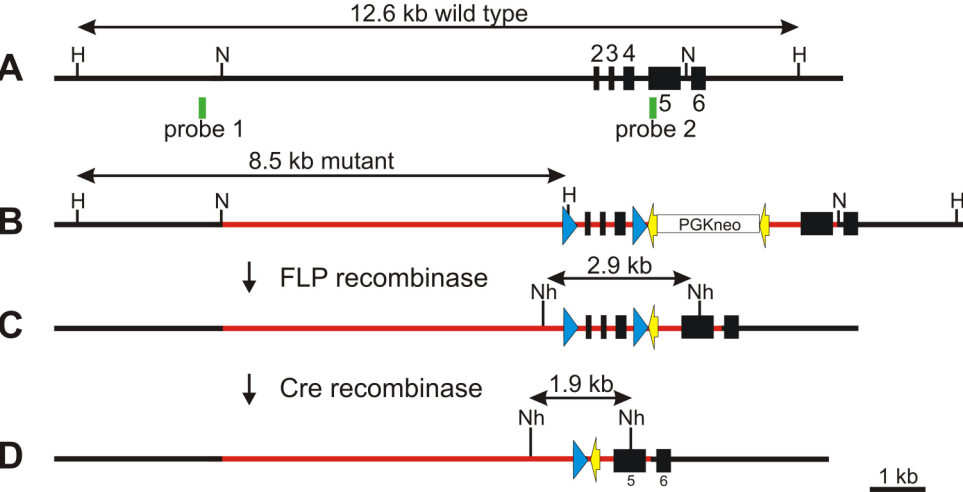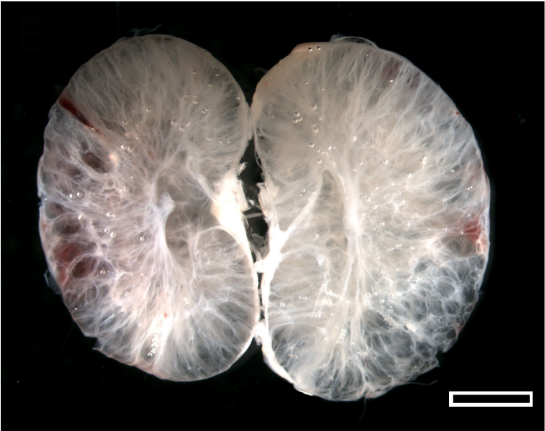

Supplementary Fig. 2

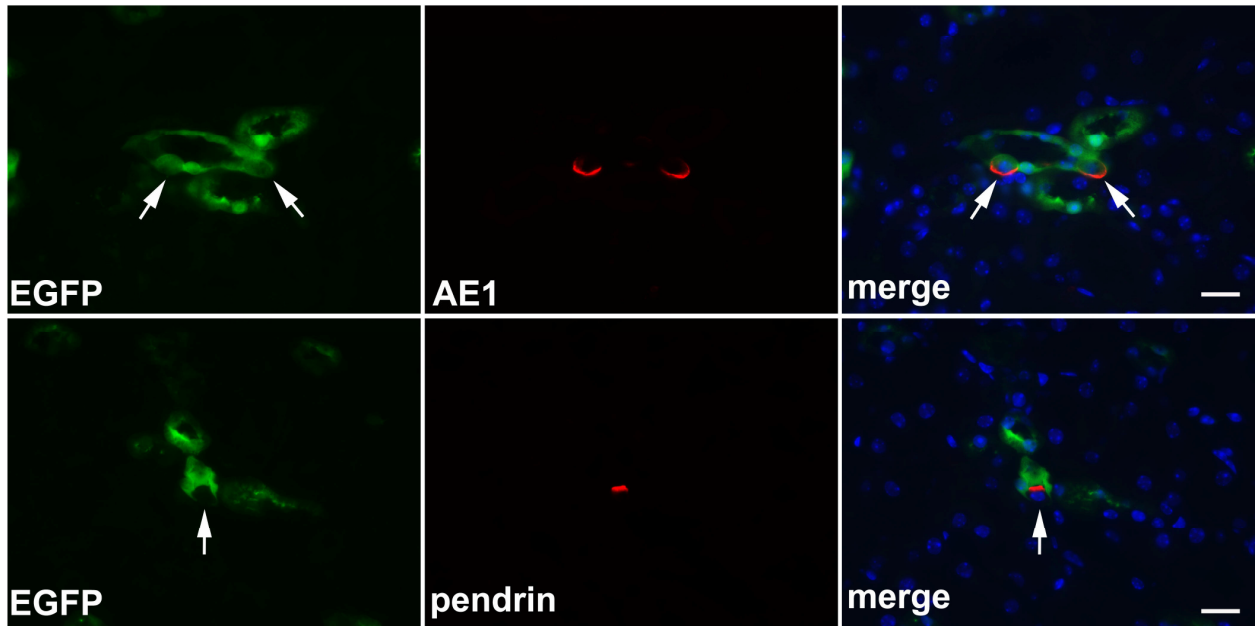

Supplementary Fig. 3

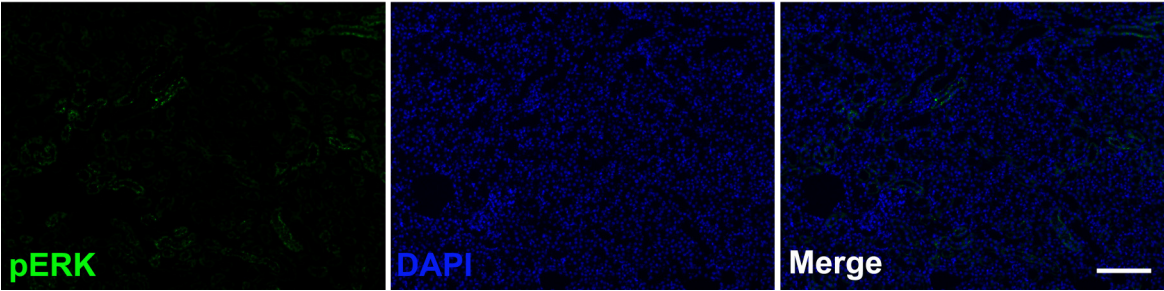

Supplementary Fig. 4

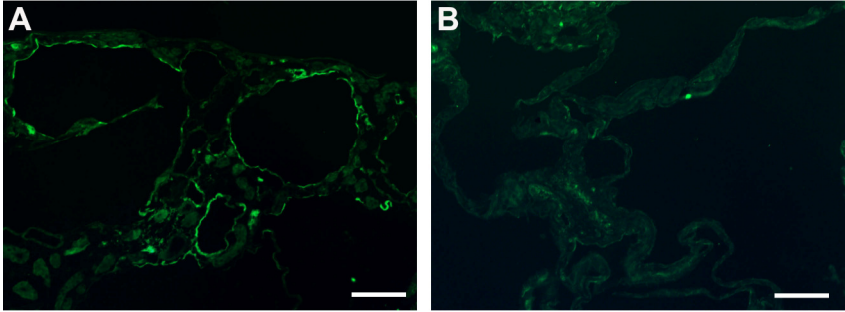

Supplement: ddn039_1.pdf [file ddn039_1.pdf]
